# Supplementary material for: Hotspot autoimmune T cell receptor binding underlies pathogen and insulin peptide cross-reactivity
Source: PubMed Central journal article supplement (PMC4887163; doi:10.1172/jci85679), 2016-05-16
Supplement: JCI85679.sd.pdf [file JCI85679.sd.pdf]

**Supplementary Table S1.** Data collection and refinement statistics for TCR-pMHC complex structures

|                                       | 1E6-A2-<br>MVW           | 1E6-A2-<br>YLG           | 1E6-A2-<br>AQW          | 1E6-A2-<br>RQF(A)        | 1E6-A2-<br>RQW          | 1E6-A2-<br>YQF           | 1E6-A2-<br>RQF(I)        |
|---------------------------------------|--------------------------|--------------------------|-------------------------|--------------------------|-------------------------|--------------------------|--------------------------|
| <b>PDB code</b>                       | 5C0A                     | 5C09                     | 5HYJ                    | 5C0C                     | 5C08                    | 5C07                     | 5C0B                     |
| <b>Data collection</b>                |                          |                          |                         |                          |                         |                          |                          |
| Space group                           | P1                       | P1                       | P1                      | P1                       | P1                      | P1                       | P1                       |
| <b>Cell dimensions</b>                |                          |                          |                         |                          |                         |                          |                          |
| <i>a, b, c</i> (Å)                    | 43.9,<br>100.0,<br>123.3 | 43.8,<br>100.1,<br>122.4 | 41.1,<br>95.6,<br>119.4 | 43.9,<br>100.4,<br>122.7 | 43.8,<br>99.3,<br>122.2 | 43.7,<br>100.5,<br>122.1 | 43.9,<br>100.3,<br>122.4 |
| $\alpha, \beta, \gamma$ (°)           | 96.7,<br>98.6,<br>95.8   | 96.9,<br>98.3,<br>96.5   | 81.1,<br>81.3,<br>85.4  | 96.9, 98,<br>96.1        | 96.3,<br>98.1,<br>96.4  | 97, 98.1,<br>96.6        | 97, 98.1,<br>96.5        |
| Resolution (Å)                        | 2.5                      | 2.5                      | 3.0                     | 2.0                      | 2.3                     | 2.1                      | 2.0                      |
| $R_{\text{merge}}$ (%)                | 8.8                      | 10.5                     | 9.6                     | 6.8                      | 4.1                     | 4.9                      | 5                        |
| $I / \sigma I$                        | 4.7                      | 4.9                      | 6.8                     | 8.3                      | 12.7                    | 11.7                     | 8                        |
| Completeness (%)                      | 97.7                     | 98.2                     | 96.9                    | 97.4                     | 97.4                    | 97                       | 97.6                     |
| Redundancy                            | 1.9                      | 2                        | 2.2                     | 2                        | 2.2                     | 2.2                      | 2                        |
| <b>Refinement</b>                     |                          |                          |                         |                          |                         |                          |                          |
| Resolution (Å)                        | 2.5                      | 2.5                      | 3.0                     | 2.0                      | 2.3                     | 2.1                      | 2.0                      |
| No. reflections                       | 68,869                   | 67,353                   | 32,310                  | 132,894                  | 79,156                  | 107,577                  | 121,919                  |
| No reflections in Rfree set           | 3,655                    | 3,581                    | 1,726                   | 7,029                    | 4,159                   | 5,674                    | 6,446                    |
| $R_{\text{work}}/R_{\text{free}}$ (%) | 19.3/<br>23.2            | 20.7/<br>25.9            | 21.2/<br>29.4           | 18.9/<br>22.7            | 20.6/<br>27.2           | 19.1/<br>23.7            | 21.4/<br>26.8            |
| <b>R.m.s. deviations</b>              |                          |                          |                         |                          |                         |                          |                          |
| Bond lengths (Å)                      | 0.01                     | 0.01                     | 0.01                    | 0.02                     | 0.02                    | 0.02                     | 0.02                     |
| Bond Angles (°)                       | 1.71                     | 1.74                     | 1.52                    | 2.04                     | 1.91                    | 1.92                     | 1.86                     |
| Mean B value (Å <sup>2</sup> )        | 68.0                     | 63.3                     | 68.3                    | 52.3                     | 55.3                    | 50.6                     | 45.6                     |
| Overall coordinate error (Å)          | 0.21                     | 0.24                     | 0.57                    | 0.12                     | 0.22                    | 0.15                     | 0.15                     |

\* One crystal was used for solving each structure.

**Supplementary Table S2.** Data collection and refinement statistics for pMHC structures

|                                       | A2-<br>MVW             | A2-<br>YLG          | A2-<br>AQW             | A2-<br>RQF(A)       | A2-<br>RQW          | A2-<br>YQF          | A2-<br>RQF(I)          |
|---------------------------------------|------------------------|---------------------|------------------------|---------------------|---------------------|---------------------|------------------------|
| <b>PDB code</b>                       | 5C0H                   | 5C0G                | 5C0D                   | 5C0J                | 5C0F                | 5C0E                | 5C0I                   |
| <b>Data collection</b>                |                        |                     |                        |                     |                     |                     |                        |
| Space group                           | P1 21 1                | P1 21 1             | P1 21 1                | P1 21 1             | P1 21 1             | P1 21 1             | P1 21 1                |
| <b>Cell dimensions</b>                |                        |                     |                        |                     |                     |                     |                        |
| <i>a, b, c</i> (Å)                    | 52.2,<br>79.5,<br>58.2 | 55, 79.1,<br>58.3   | 52.8,<br>81.2,<br>56.2 | 56.3,<br>80.1, 57   | 56.4,<br>79.8, 57   | 56.1,<br>79.7, 57   | 55.7,<br>79.7,<br>58.1 |
| $\alpha, \beta, \gamma$ (°)           | 90,<br>115.7,<br>90    | 90,<br>115.6,<br>90 | 90,<br>112.3,<br>90    | 90,<br>115.8,<br>90 | 90,<br>115.7,<br>90 | 90,<br>115.7,<br>90 | 90,<br>115.7,<br>90    |
| Resolution (Å)                        | 1.4                    | 1.4                 | 1.7                    | 1.6                 | 1.5                 | 1.5                 | 1.5                    |
| $R_{\text{merge}}$ (%)                | 4                      | 4.1                 | 8.4                    | 5.1                 | 4.9                 | 8.5                 | 4.6                    |
| $I / \sigma I$                        | 11.9                   | 14.4                | 8.7                    | 11.7                | 14.7                | 12.2                | 12.1                   |
| Completeness (%)                      | 98.3                   | 94.6                | 98.8                   | 99.6                | 99.4                | 99                  | 99                     |
| Redundancy                            | 3.5                    | 3.3                 | 3.9                    | 3.6                 | 4                   | 3.9                 | 3.7                    |
| <b>Refinement</b>                     |                        |                     |                        |                     |                     |                     |                        |
| Resolution (Å)                        | 1.39                   | 1.37                | 1.68                   | 1.64                | 1.46                | 1.49                | 1.53                   |
| No. reflections                       | 84,676                 | 86,810              | 46,848                 | 52,281              | 73,875              | 69,115              | 64,507                 |
| No reflections in Rfree set           | 4,467                  | 4,579               | 2,496                  | 2,796               | 3,913               | 3,669               | 3,448                  |
| $R_{\text{work}}/R_{\text{free}}$ (%) | 17.2/<br>20.1          | 16.2/<br>18.8       | 17.3/<br>21.4          | 18.0/<br>21.4       | 15.4/<br>18.1       | 15.7/<br>17.9       | 15.9/<br>19.1          |
| <b>R.m.s. deviations</b>              |                        |                     |                        |                     |                     |                     |                        |
| Bond lengths (Å)                      | 0.024                  | 0.021               | 0.018                  | 0.020               | 0.019               | 0.021               | 0.021                  |
| Bond Angles (°)                       | 2.28                   | 2.24                | 1.83                   | 1.96                | 2.09                | 2.36                | 2.07                   |
| Mean B value (Å <sup>2</sup> )        | 22.5                   | 19.3                | 20.4                   | 26.9                | 18.3                | 19.6                | 25.2                   |
| Overall coordinate error (Å)          | 0.043                  | 0.042               | 0.086                  | 0.072               | 0.045               | 0.049               | 0.058                  |

\* One crystal was used for solving each structure.

**Supplementary Table 3:** Affinity measurements, using surface plasmon resonance, for the 1E6 TCR binding to peptide variants at different temperatures.

| Temp (°C) | ALW   | RQW  | AQW   | RQF(A) | YQF  | RQF(I) |
|-----------|-------|------|-------|--------|------|--------|
| 5         | 185.5 | 8.2  | 56.3  | 34.7   | 5.4  | 0.9    |
| 13        | 168.2 | 7.3  | 50.8  | 32.4   | 5.3  | 1      |
| 18        | 176.4 | 7.2  | 52    | 36.7   | 6    | 0.87   |
| 25        | 208   | 7.8  | 61.9  | 44.4   | 7.4  | 0.49   |
| 32        | 297.5 | 9.5  | 113.8 | 89     | 9    | 0.38   |
| 37        | 482.4 | 11.8 | 231   | 107.2  | 10.5 | 0.42   |

Values in the table are affinities calculated from equilibrium binding experiments at different temperatures,  $K_D$  ( $\mu\text{M}$ )

**Supplementary Table 4:** Peptide sequences from the known viral proteome containing a xOxGPDxxxO motif (O=hydrophobic amino acid). 53 peptide motifs identified in 151 different sequences out of 10733 total sequences (1.4%).

| PEPTIDE    | PROTEIN [VIRUS]                                                             |
|------------|-----------------------------------------------------------------------------|
| LILGPDDHVL | RABVR GLYCOPROTEIN G [RABIES VIRUS CHINA/MRV]                               |
| IILGPDGHVL | VGLG_RABVT GLYCOPROTEIN G [RABIES VIRUS ALGERIA/1991]                       |
| RLPGPDTRHL | A36R [MONKEYPOX VIRUS ZAIRE-96-I-16]                                        |
| IILGPDGNVL | VGLG_RABVB GLYCOPROTEIN G [RABIES VIRUS SILVER-HAIRED BAT-ASSOCIATED]       |
| GVTGPDSKAV | NEURAMINIDASE [INFLUENZA A VIRUS]                                           |
| HMGGPDDPAV | TEGUMENT PROTEIN VP13/14 [MACACINE HERPESVIRUS 1]                           |
| VVRGPDGCGM | POLYPROTEIN PRECURSOR [SAPOVIRUS MC10]                                      |
| KVQGPDLRDV | POLYPROTEIN [HUMAN COSAVIRUS B]                                             |
| KISGPDLLNA | DBP [HUMAN ADENOVIRUS 1]                                                    |
| PVSGPDYPL  | BFRF2 [HUMAN HERPESVIRUS 4 TYPE 2]                                          |
| SLPGDAEKW  | MAJOR CORE PROTEIN LAMBDA 1 [MAMMALIAN ORTHOREOVIRUS 3]                     |
| QLPGPDVHPL | MC142R [MOLLUSCUM CONTAGIOSUM VIRUS SUBTYPE 1]                              |
| IIKGPDGHIL | VGLG_LBV GLYCOPROTEIN G [LAGOS BAT VIRUS]                                   |
| GISGPDDEAV | NEURAMINIDASE [INFLUENZA A VIRUS USA:HUSTON/AA/1945 H1N1]                   |
| RVCGPDEKWI | NUCLEOPROTEIN [THOGOTO VIRUS]                                               |
| GISGPDGAV  | NEURAMINIDASE [INFLUENZA A VIRUS LENINGRAD/1/1954 H1N1]                     |
| GITGPDATAV | NEURAMINIDASE [INFLUENZA A VIRUS]                                           |
| GVDGPDNNAL | NEURAMINIDASE [INFLUENZA B VIRUS]                                           |
| GVDGPDNSAL | NEURAMINIDASE [INFLUENZA B VIRUS (STRAIN B/SINGAPORE/222/1979)]             |
| MAHGPDMAV  | DNA REPLICATION ORIGIN-BINDING HELICASE [SUID HERPESVIRUS 1]                |
| GISGPDNEAV | NEURAMINIDASE [INFLUENZA A VIRUS USA:PHILA/1935 H1N1]                       |
| GISGPDNGAV | NEURAMINIDASE [INFLUENZA A VIRUS CHICKEN/SHANTOU/4231/2003 H5N1]            |
| AISGPDNGAV | NEURAMINIDASE [INFLUENZA A VIRUS CHICKEN/HONG KONG/37.4/2002 H5N1]          |
| LLQGPDGSY  | PROTEIN DR1 [HUMAN HERPESVIRUS 7]                                           |
| GIPGPDYDFV | MC080R [MOLLUSCUM CONTAGIOSUM VIRUS SUBTYPE 1]                              |
| GVDGPDNDAL | NEURAMINIDASE [INFLUENZA B VIRUS]                                           |
| GVDGPDSDAL | NEURAMINIDASE [INFLUENZA B VIRUS MARYLAND/1959]                             |
| IIKGPDGQIL | TRANSMEMBRANE GLYCOPROTEIN G [MOKOLA VIRUS]                                 |
| YAPGPDGTII | IVA2 [HUMAN ADENOVIRUS 1]                                                   |
| SVWGPDGALA | EARLY TRANSCRIPTION FACTOR [PSEUDOCOWPOX VIRUS]                             |
| HAVGPDFRKY | NONSTRUCTURAL PROTEIN NSP3 [AURA VIRUS]                                     |
| RLCGPDAAW  | TRANSCRIPTIONAL REGULATOR ICP4 [HUMAN HERPESVIRUS 1]                        |
| LAQGPDLRDL | POLYPROTEIN [HUMAN COSAVIRUS D]                                             |
| LAVGPDDEVA | RIBONUCLEOTIDE REDUCTASE SUBUNIT 1 [HUMAN HERPESVIRUS 5]                    |
| TYQGPDDVYV | MINOR CORE PROTEIN [MAMMALIAN ORTHOREOVIRUS 3]                              |
| PYNGPDKKSL | 3B [HUMAN COSAVIRUS B]                                                      |
| TWEGPDENAI | POLYPROTEIN [POWASSAN VIRUS]                                                |
| SVPGPDPRWL | HHV6U UNCHARACTERIZED PROTEIN DR2 [HUMAN HERPESVIRUS 6A STRAIN UGANDA-1102] |
| TLEGPDPGA  | ENCAPSIDATION PROTEIN IVA2 [HUMAN MASTADENOVIRUS E]                         |
| EYYGPDYPYW | ORF1 [TORQUE TENO TADARIDA BRASILIENSIS VIRUS]                              |
| CFEGPDEHEI | POLG_YEFCV GENOME POLYPROTEIN [YELLOW FEVER VIRUS ISOLATE IVORY COAST/1999] |
| DATGPDGPLV | VP2 [GREAT ISLAND VIRUS]                                                    |
| EYIGPDLWPF | HELICASE-PRIMASE SUBUNIT [HUMAN HERPESVIRUS 6A]                             |
| CMVGPDYAYF | 1AB POLYPROTEIN [MIDDLE EAST RESPIRATORY SYNDROME CORONAVIRUS]              |
| NFCGPDGYPL | NSP2-PP1A/PP1AB [SARS CORONAVIRUS]                                          |
| PAPGPDPLEI | EBNA-3B NUCLEAR PROTEIN [HUMAN HERPESVIRUS 4]                               |
| YFNGPDRDLW | HASV1 NON-STRUCTURAL POLYPROTEIN 1AB [HUMAN ASTROVIRUS-1]                   |
| AAGGPDDEPA | RIBONUCLEOTIDE REDUCTASE SUBUNIT 1 [PAPIINE HERPESVIRUS 2]                  |
| SFWGPDGCWY | POLYPROTEIN [WESSELSBRON VIRUS]                                             |
| YFNGPDKDLW | HASV4 NON-STRUCTURAL POLYPROTEIN 1AB [HUMAN ASTROVIRUS-4]                   |
| AAGGPDQTAA | DNA PACKAGING TERMINASE SUBUNIT 2 [PAPIINE HERPESVIRUS 2]                   |
| TASGPDAREA | TEGUMENT PROTEIN VP13/14 [SUID HERPESVIRUS 1]                               |
| PAAGPDAVEA | ORF75 [HUMAN HERPESVIRUS 8]                                                 |

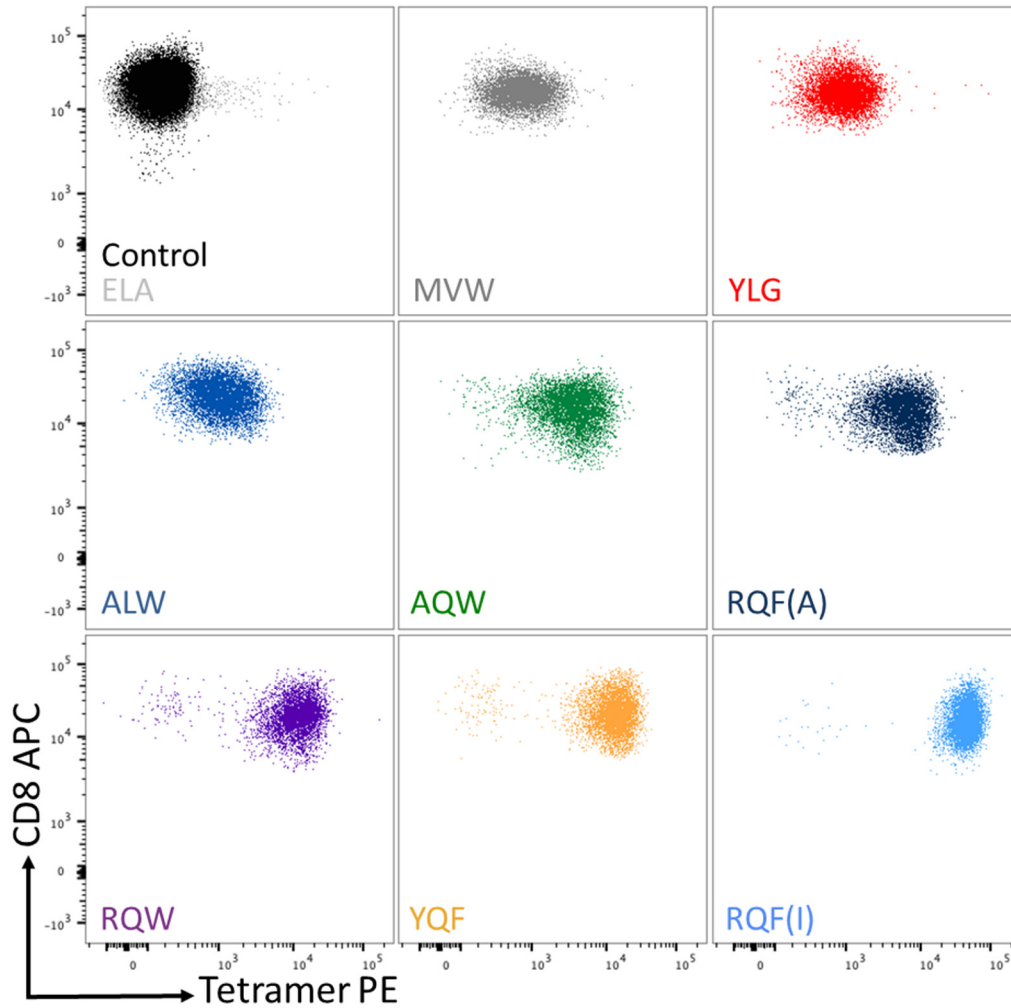

**Supplementary Figure S1:** The 1E6 clone was left unstained (control) or stained with PE-conjugated 1E6 APL or irrelevant (ELA) tetramers, as indicated. The dots plots were generated by sequentially gating based on forward and side scatter, then viability and CD8 expression. The MFI was established for the population shown without any further gating.
